# Supplementary material for: In search of causal pathways in diabetes: a study using proteomics and genotyping data from a cross-sectional study
Source: PubMed Central journal article supplement (PMC6805963; doi:10.1007/s00125-019-4960-8), 2019-08-24

ESM Table 1. Power calculation for the MR analysis. The  $R^2$  is the protein level variance explained by the lead SNP. The power for the MR-analysis was calculated by the free software (<https://sb452.shinyapps.io/power/>) for an odds ratio of 1.1 (or 0.9) using the study by Xue et al (21) with 62,892 T2D cases and 596,424 control persons and a significance level of  $p=0.05$ .

| Gene                                                         | SNP rs-number | $R^2$  | Power |
|--------------------------------------------------------------|---------------|--------|-------|
| <b>EpiHealth GWAS (SNP-exposure associations)</b>            |               |        |       |
| CCL16                                                        | rs11080369    | 0.205  | 100   |
| CTSD                                                         | rs7122341     | 0.046  | 100   |
| IDUA                                                         | rs3796622     | 0.291  | 100   |
| IL-1Ra                                                       | rs4251961     | 0.027  | 96    |
| LPL                                                          | rs325         | 0.054  | 100   |
| TIM-1                                                        | rs6878069     | 0.213  | 100   |
| VSIG2                                                        | rs11219769    | 0.029  | 97    |
| GDF15                                                        | rs1227731     | 0.052  | 100   |
| IL1RT1                                                       | rs1024794     | 0.0192 | 89    |
| PON3                                                         | rs10487132    | 0.062  | 100   |
| <b>Previously published GWAS (SNP-exposure associations)</b> |               |        |       |
| CTSD                                                         | rs55861089    | 0.054  | 100   |
| SELPLG                                                       | rs73191242    | 0.013  | 75    |
| IDUA                                                         | rs3822020     | 0.220  | 100   |
| CATZ                                                         | rs199825459   | 0.092  | 100   |

|          |             |       |     |
|----------|-------------|-------|-----|
| ENPP7    | rs11871061  | 0.426 | 100 |
| GDF15    | rs45543339  | 0.102 | 100 |
| IL-1Ra   | rs6761276   | 0.027 | 96  |
| TIM-1    | rs6889164   | 0.059 | 100 |
| Siglec-7 | rs140185670 | 0.043 | 100 |

ESM Table 2. Odds ratio (OR), 95% confidence interval (CI) and p-value for the 29 proteins associated with prevalent diabetes in the validation analysis of the observational study in EpiHealth following adjustment for diabetes medication. Only the proteins with a false discovery rate (FDR) <5% in the validation step were included in the table.

| Protein                   | Short name | OR   | Lower<br>95%CI limit | Higher<br>95%CI limit | p-value   |
|---------------------------|------------|------|----------------------|-----------------------|-----------|
| Cathepsin D               | CTSD       | 1.79 | 1.38                 | 2.32                  | 9.56e-06  |
| Hydroxyacid<br>oxidase 1  | HAOX1      | 1.69 | 1.28                 | 2.24                  | 0.0002564 |
| Galectin-4                | Gal-4      | 1.69 | 1.28                 | 2.25                  | 0.0002575 |
| Lipoprotein<br>lipase     | LPL        | 0.55 | 0.4                  | 0.77                  | 0.0005328 |
| Interleukin-1<br>receptor | IL-1ra     | 1.75 | 1.27                 | 2.42                  | 0.0006643 |

|                                      |         |      |      |      |           |
|--------------------------------------|---------|------|------|------|-----------|
| antagonist protein                   |         |      |      |      |           |
| Gastric intrinsic factor             | GIF     | 1.73 | 1.26 | 2.38 | 0.000752  |
| Sialic acid-binding Ig-like lectin 7 | SIGLEC7 | 1.64 | 1.22 | 2.21 | 0.0011108 |
| Plasminogen activator inhibitor 1    | PAI     | 1.65 | 1.22 | 2.24 | 0.0013094 |
| Cathepsin Z                          | CTSZ    | 1.63 | 1.2  | 2.23 | 0.0018956 |
| Cadherin-2                           | CDH2    | 1.56 | 1.16 | 2.11 | 0.0033674 |
| Insulin-like Growth Factor-          | IGFBP-2 | 0.64 | 0.47 | 0.88 | 0.0052053 |

|                                   |        |      |      |      |           |
|-----------------------------------|--------|------|------|------|-----------|
| Binding Protein 2                 |        |      |      |      |           |
| Paraoxonase (PON 3)               | PON3   | 0.66 | 0.49 | 0.9  | 0.008036  |
| Tissue-type plasminogen activator | t-PA   | 1.63 | 1.13 | 2.35 | 0.0087763 |
| Prostasin                         | PRSS8  | 1.52 | 1.07 | 2.14 | 0.0179974 |
| P-selectin glycoprotein ligand 1  | PSGL-1 | 1.49 | 1.07 | 2.07 | 0.0190852 |
| Nodal modulator 1                 | NOMO1  | 1.4  | 1.05 | 1.88 | 0.0237439 |

ESM Table 3. Odds ratio (OR), 95% confidence interval (CI) and p-value for the 29 proteins associated with prevalent diabetes in the validation analysis in the main analysis. In this additional analysis, subjects with diabetic medication (n=67) were excluded. See table 2 for the abbreviations of the proteins. The proteins are given in same order as in table 2.

| Protein | OR   | Lower 95%CI limit | Higher 95%CI limit | p-value |
|---------|------|-------------------|--------------------|---------|
| CTSD    | 1.61 | 1.18              | 2.20               | 0.002   |
| ALDH1A1 | 1.40 | 1.01              | 1.95               | 0.041   |
| IDUA    | 1.97 | 1.28              | 3.03               | 0.002   |
| HAO1    | 1.43 | 0.99              | 2.06               | 0.055   |
| Gal-4   | 1.16 | 0.82              | 1.62               | 0.399   |
| GDF-15  | 1.05 | 0.69              | 1.60               | 0.821   |
| LPL     | 0.73 | 0.47              | 1.13               | 0.159   |
| IL-1ra  | 1.34 | 0.91              | 1.98               | 0.139   |
| CTSO    | 1.08 | 0.75              | 1.56               | 0.687   |
| SIGLEC7 | 1.25 | 0.86              | 1.82               | 0.249   |
| PAI-1   | 1.92 | 1.31              | 2.84               | 9.2e-04 |
| CCL16   | 1.92 | 1.15              | 3.21               | 0.012   |
| SELE    | 1.57 | 1.03              | 2.40               | 0.036   |
| CTSZ    | 1.49 | 1.02              | 2.18               | 0.040   |
| ACE2    | 1.32 | 0.93              | 1.89               | 0.118   |
| VSIG2   | 1.31 | 0.90              | 1.90               | 0.159   |

|         |      |      |      |         |
|---------|------|------|------|---------|
| ENPP7   | 1.50 | 1.04 | 2.17 | 0.030   |
| TR-AP   | 1.53 | 1.04 | 2.24 | 0.031   |
| CDH2    | 1.25 | 0.85 | 1.85 | 0.252   |
| IGFBP-2 | 0.65 | 0.43 | 0.96 | 0.030   |
| FABP4   | 1.40 | 0.89 | 2.20 | 0.149   |
| DDC     | 1.21 | 0.83 | 1.77 | 0.320   |
| PON3    | 0.79 | 0.53 | 1.17 | 0.240   |
| IL-1RT1 | 1.26 | 0.86 | 1.86 | 0.235   |
| t-PA    | 2.50 | 1.51 | 4.16 | 3.8e-04 |
| KIM-1   | 1.18 | 0.77 | 1.79 | 0.446   |
| PRSS8   | 1.45 | 0.95 | 2.20 | 0.083   |
| PSGL-1  | 1.24 | 0.83 | 1.85 | 0.295   |
| NOMO1   | 0.96 | 0.66 | 1.38 | 0.808   |

ESM Table 4. Genotypes used as instrumental variables for all proteins where single nucleotide variants located within the respective protein's gene with genome-wide significant association ( $P < 5 \times 10^{-8}$ ) with protein levels could be identified in EpiHealth and/or literature review. For protein abbreviations, see table 2.

| <b>Protein</b>                                    | <b>Original SNP</b> | <b>Proxy/availability</b> | <b>Effect allele</b> | <b>Other allele</b> | <b>beta</b> | <b>SE</b> | <b>p-value</b> |
|---------------------------------------------------|---------------------|---------------------------|----------------------|---------------------|-------------|-----------|----------------|
| <b>EpiHealth GWAS (SNP-exposure associations)</b> |                     |                           |                      |                     |             |           |                |
| CCL16                                             | rs11080369          | NA                        | C                    | A                   | -1.27       | 0.05      | 3.27e-98       |
| CTSD                                              | rs7122341           | NA                        | C                    | T                   | -0.33       | 0.03      | 4.93e-18       |
| IDUA                                              | rs3796622           | NA                        | C                    | T                   | 0.64        | 0.02      | 1.84e-97       |
| IL-1Ra                                            | rs4251961           | NA                        | C                    | T                   | -0.25       | 0.03      | 1.68e-15       |
| LPL                                               | rs325               | NA                        | C                    | T                   | -0.60       | 0.05      | 2.84e-32       |
| TIM-1                                             | rs6878069           | NA                        | G                    | A                   | -0.52       | 0.02      | 3.72e-74       |
| VSIG2                                             | rs11219769          | NA                        | T                    | G                   | 0.26        | 0.03      | 4.13e-15       |
| GDF15                                             | rs1227731           | NA                        | A                    | G                   | 0.47        | 0.04      | 1.97e-25       |
| IL1RT1                                            | rs1024794           | NA                        | G                    | A                   | 0.21        | 0.03      | 1.14e-12       |



|                                                              |             |                                            |   |   |       |       |          |
|--------------------------------------------------------------|-------------|--------------------------------------------|---|---|-------|-------|----------|
| PON3                                                         | rs10487132  | NA                                         | G | A | 0.36  | 0.028 | 1.53e-34 |
| <b>Previously published GWAS (SNP-exposure associations)</b> |             |                                            |   |   |       |       |          |
| CTSD                                                         | rs55861089  | rs72850969 (only T2D)                      | A | G | 0.41  | 0.03  | 8.0e-26  |
| SELPLG                                                       | rs73191242  | rs8179151 (only T2D)                       | G | A | 0.20  | 0.03  | 2.0e-12  |
| IDUA                                                         | rs3822020   | rs3796622 (only FG, HOMA-IR)               | G | A | 0.61  | 0.02  | 7.2e-148 |
| CATZ                                                         | rs199825459 | NA                                         | G | A | 2.20  | 0.12  | 2.6e-76  |
| ENPP7                                                        | rs11871061  | available for FG, HOMA-IR, no proxy in T2D | C | T | 0.99  | 0.02  | 4.9e-531 |
| GDF15                                                        | rs45543339  | rs16982345 (only FG, HOMA-IR)              | T | C | 0.58  | 0.03  | 1.4e-99  |
| IL-1Ra                                                       | rs6761276   | available for FG, HOMA-IR, T2D             | C | T | -0.19 | 0.02  | 1.5e-14  |
| TIM-1                                                        | rs6889164   | available for FG, HOMA-IR, T2D             | C | T | -0.43 | 0.03  | 2.5e-59  |
| Siglec-7                                                     | rs140185670 | NA                                         | C | G | -0.61 | 0.05  | 1.7e-36  |

ESM Table 5. Mendelian randomization analysis regarding causal effects of proteins on diabetes and two other related traits, fasting glucose and the HOMA insulin resistance index. In the upper part of the table are proteins for which a significant instrumental variable (IV) was found in EpiHealth given. In the lower part, IVs from the literature were used. FG= fasting glucose, HOMA= HOMA insulin resistance index, T2D= type 2 diabetes. For protein abbreviations, see table 2.

| <b>Exposure</b>                                   | <b>Outcome</b> | <b>IV estimate</b> | <b>SE</b> | <b>P-value</b> |
|---------------------------------------------------|----------------|--------------------|-----------|----------------|
| <b>EpiHealth GWAS (SNP-exposure associations)</b> |                |                    |           |                |
|                                                   | FG             | -0.001             | 0.003     | 6.9E-01        |
| CCL16                                             | HOMA           | 0.005              | 0.006     | 4.6E-01        |
|                                                   | T2D            | -0.012             | 0.015     | 4.2E-01        |
| CTSD                                              | T2D            | -0.012             | 0.029     | 6.8E-01        |
|                                                   | FG             | 0.005              | 0.006     | 4.0E-01        |
| IDUA                                              | HOMA           | 0.000              | 0.007     | 9.8E-01        |
|                                                   | FG             | 0.018              | 0.013     | 1.6E-01        |
| IL1RA                                             | HOMA           | -0.004             | 0.017     | 8.1E-01        |
|                                                   | T2D            | 0.004              | 0.030     | 8.9E-01        |
|                                                   | FG             | 0.014              | 0.008     | 1.1E-01        |
| LPL                                               | HOMA           | 0.022              | 0.011     | 4.6E-02        |
|                                                   | T2D            | 0.100              | 0.020     | 6.5E-07        |
|                                                   | FG             | -0.005             | 0.006     | 3.7E-01        |
| TIM-1                                             | HOMA           | -0.010             | 0.007     | 1.8E-01        |
|                                                   | T2D            | 0.024              | 0.015     | 1.2E-01        |
|                                                   | FG             | 0.013              | 0.013     | 3.3E-01        |
| VSIG2                                             | HOMA           | -0.004             | 0.017     | 8.1E-01        |
|                                                   | T2D            | 0.007              | 0.034     | 8.5E-01        |
|                                                   | FG             | 0.001              | 0.010     | 9.3E-01        |
| GDF15                                             | HOMA           | 0.009              | 0.013     | 5.1E-01        |
|                                                   | FG             | 0.007              | 0.015     | 6.4E-01        |
| IL1RT1                                            | HOMA           | -0.006             | 0.019     | 7.4E-01        |
|                                                   | T2D            | -0.030             | 0.038     | 4.4E-01        |
| PON3                                              | FG             | 0.014              | 0.009     | 1.2E-01        |

|      |        |       |         |
|------|--------|-------|---------|
| HOMA | 0.001  | 0.012 | 9.2E-01 |
| T2D  | -0.020 | 0.022 | 3.6E-01 |

---

**Previously published GWAS (SNP-exposure associations)**

---

|        |      |          |       |         |
|--------|------|----------|-------|---------|
| IDUA   | FG   | 0.005    | 0.006 | 4.0E-01 |
|        | HOMA | -1.6E-04 | 0.008 | 9.8E-01 |
| IL1ra  | FG   | 0.006    | 0.016 | 7.0E-01 |
|        | HOMA | -0.006   | 0.022 | 7.9E-01 |
|        | T2D  | -0.015   | 0.043 | 7.3E-01 |
| GDF15  | FG   | -0.016   | 0.007 | 2.3E-02 |
|        | HOMA | 0.001    | 0.010 | 9.1E-01 |
| ENPP7  | FG   | 0.003    | 0.004 | 4.8E-01 |
|        | HOMA | 0.010    | 0.008 | 2.1E-01 |
| TIM-1  | FG   | -0.041   | 0.024 | 8.3E-02 |
|        | HOMA | 0.002    | 0.031 | 9.5E-01 |
|        | T2D  | 0.101    | 0.057 | 7.3E-02 |
| CTSD   | T2D  | -0.031   | 0.034 | 3.6E-01 |
| SELPLG | T2D  | 0.060    | 0.048 | 2.1E-01 |

---

ESM Table 6. Mendelian randomization analyses regarding the causal effect of three glucose-related traits, diabetes (T2D), fasting glucose (FG), and insulin resistance (HOMA-IR) on protein levels. Both the inverse variance weighted and the MR Egger estimated were calculated for each pair of glucose trait and protein.

| Exposure | Outcome | No. SNPs | Method                    | IV estimate | SE    | P-value | Heterogeneity P-value | Egger intercept P-value |
|----------|---------|----------|---------------------------|-------------|-------|---------|-----------------------|-------------------------|
| T2D      |         | 120      | Inverse variance weighted | -0.020      | 0.047 | 6.7E-01 | 3.2E-01               |                         |
|          |         |          | MR Egger                  | -0.154      | 0.117 | 1.9E-01 | 3.3E-01               | 0.217                   |
| FG       | ACE2    | 29       | Inverse variance weighted | -0.159      | 0.216 | 4.6E-01 | 9.3E-01               |                         |
|          |         |          | MR Egger                  | -0.089      | 0.396 | 8.2E-01 | 9.0E-01               | 0.835                   |
| HOMA-IR  |         | 9        | Inverse variance weighted | 1.931       | 1.228 | 1.2E-01 | 6.3E-02               |                         |
|          |         |          | MR Egger                  | -7.244      | 4.552 | 1.6E-01 | 2.4E-01               | 0.077                   |
| T2D      | CCL16   | 120      | Inverse variance weighted | 0.001       | 0.045 | 9.9E-01 | 5.6E-01               |                         |
|          |         |          | MR Egger                  | -0.136      | 0.112 | 2.3E-01 | 5.8E-01               | 0.187                   |
| FG       |         | 29       | Inverse variance weighted | -0.138      | 0.212 | 5.1E-01 | 7.4E-01               |                         |

|         |      |     |                  |        |       |         |         |       |
|---------|------|-----|------------------|--------|-------|---------|---------|-------|
|         |      |     | MR Egger         | 0.038  | 0.388 | 9.2E-01 | 7.1E-01 | 0.593 |
|         |      |     | Inverse variance |        |       |         |         |       |
| HOMA-IR |      | 9   | weighted         | 2.284  | 1.058 | 3.1E-02 | 1.8E-01 |       |
|         |      |     | MR Egger         | -6.139 | 3.891 | 1.6E-01 | 4.8E-01 | 0.062 |
| <hr/>   |      |     |                  |        |       |         |         |       |
|         |      |     | Inverse variance |        |       |         |         |       |
| T2D     |      | 120 | weighted         | 0.080  | 0.050 | 1.1E-01 | 1.2E-01 |       |
|         |      |     | MR Egger         | -0.102 | 0.124 | 4.1E-01 | 1.5E-01 | 0.113 |
|         |      |     | Inverse variance |        |       |         |         |       |
| FG      | CTSD | 29  | weighted         | -0.117 | 0.231 | 6.1E-01 | 3.4E-01 |       |
|         |      |     | MR Egger         | -0.139 | 0.431 | 7.5E-01 | 2.9E-01 | 0.950 |
|         |      |     | Inverse variance |        |       |         |         |       |
| HOMA-IR |      | 9   | weighted         | 1.670  | 0.920 | 7.0E-02 | 6.6E-01 |       |
|         |      |     | MR Egger         | 0.499  | 4.053 | 9.1E-01 | 5.6E-01 | 0.775 |
| <hr/>   |      |     |                  |        |       |         |         |       |
|         |      |     | Inverse variance |        |       |         |         |       |
| T2D     |      | 120 | weighted         | 0.042  | 0.050 | 3.9E-01 | 4.0E-02 |       |
|         |      |     | MR Egger         | -0.179 | 0.123 | 1.5E-01 | 6.0E-02 | 0.053 |
|         |      |     | Inverse variance |        |       |         |         |       |
| FG      | CTSZ | 29  | weighted         | -0.298 | 0.214 | 1.6E-01 | 4.4E-01 |       |
|         |      |     | MR Egger         | 0.135  | 0.388 | 7.3E-01 | 4.8E-01 | 0.195 |
|         |      |     | Inverse variance |        |       |         |         |       |
| HOMA-IR |      | 9   | weighted         | 1.597  | 0.884 | 7.1E-02 | 9.1E-01 |       |
| <hr/>   |      |     |                  |        |       |         |         |       |

|         |       |     |                  |        |       |         |         |       |
|---------|-------|-----|------------------|--------|-------|---------|---------|-------|
|         |       |     | MR Egger         | 1.148  | 3.890 | 7.8E-01 | 8.6E-01 | 0.909 |
|         |       |     | Inverse variance |        |       |         |         |       |
| T2D     |       | 120 | weighted         | -0.088 | 0.051 | 8.3E-02 | 1.5E-02 |       |
|         |       |     | MR Egger         | -0.249 | 0.127 | 5.3E-02 | 1.8E-02 | 0.172 |
|         |       |     | Inverse variance |        |       |         |         |       |
| FG      | FABP4 | 29  | weighted         | -0.762 | 0.212 | 3.3E-04 | 9.6E-01 |       |
|         |       |     | MR Egger         | -0.652 | 0.389 | 1.1E-01 | 9.5E-01 | 0.740 |
|         |       |     | Inverse variance |        |       |         |         |       |
| HOMA-IR |       | 9   | weighted         | -1.370 | 1.204 | 2.5E-01 | 6.3E-02 |       |
|         |       |     | MR Egger         | -7.936 | 5.056 | 1.6E-01 | 1.1E-01 | 0.224 |
|         |       |     | Inverse variance |        |       |         |         |       |
| T2D     |       | 120 | weighted         | -0.033 | 0.045 | 4.5E-01 | 9.2E-01 |       |
|         |       |     | MR Egger         | -0.028 | 0.112 | 8.0E-01 | 9.1E-01 | 0.961 |
|         |       |     | Inverse variance |        |       |         |         |       |
| FG      | GDF15 | 29  | weighted         | -0.406 | 0.231 | 7.9E-02 | 2.3E-01 |       |
|         |       |     | MR Egger         | -0.597 | 0.429 | 1.8E-01 | 2.1E-01 | 0.600 |
|         |       |     | Inverse variance |        |       |         |         |       |
| HOMA-IR |       | 9   | weighted         | 1.110  | 0.884 | 2.1E-01 | 8.9E-01 |       |
|         |       |     | MR Egger         | 1.478  | 3.893 | 7.2E-01 | 8.2E-01 | 0.925 |
|         |       |     | Inverse variance |        |       |         |         |       |
| T2D     | Gal4  | 120 | weighted         | -0.059 | 0.075 | 4.3E-01 | 5.2E-23 |       |

|         |       |     |                  |        |       |         |         |       |
|---------|-------|-----|------------------|--------|-------|---------|---------|-------|
|         |       |     | MR Egger         | -0.038 | 0.190 | 8.4E-01 | 3.1E-23 | 0.902 |
|         |       |     | Inverse variance |        |       |         |         |       |
| FG      |       | 29  | weighted         | 0.048  | 0.228 | 8.3E-01 | 2.5E-01 |       |
|         |       |     | MR Egger         | 0.166  | 0.426 | 7.0E-01 | 2.1E-01 | 0.745 |
|         |       |     | Inverse variance |        |       |         |         |       |
| HOMA-IR |       | 9   | weighted         | 0.607  | 1.099 | 5.8E-01 | 1.3E-01 |       |
|         |       |     | MR Egger         | -4.339 | 4.801 | 4.0E-01 | 1.5E-01 | 0.325 |
| <hr/>   |       |     |                  |        |       |         |         |       |
|         |       |     | Inverse variance |        |       |         |         |       |
| T2D     |       | 120 | weighted         | -0.005 | 0.050 | 9.2E-01 | 5.8E-02 |       |
|         |       |     | MR Egger         | -0.303 | 0.123 | 1.5E-02 | 1.2E-01 | 0.009 |
|         |       |     | Inverse variance |        |       |         |         |       |
| FG      | HAOX1 | 29  | weighted         | -0.180 | 0.263 | 4.9E-01 | 5.6E-02 |       |
|         |       |     | MR Egger         | 0.108  | 0.487 | 8.3E-01 | 5.1E-02 | 0.487 |
|         |       |     | Inverse variance |        |       |         |         |       |
| HOMA-IR |       | 9   | weighted         | 0.224  | 0.904 | 8.0E-01 | 5.4E-01 |       |
|         |       |     | MR Egger         | -5.968 | 3.978 | 1.8E-01 | 7.4E-01 | 0.154 |
| <hr/>   |       |     |                  |        |       |         |         |       |
|         |       |     | Inverse variance |        |       |         |         |       |
| T2D     |       | 120 | weighted         | 0.058  | 0.050 | 2.5E-01 | 6.1E-02 |       |
|         | IDUA  |     | MR Egger         | 0.112  | 0.126 | 3.8E-01 | 5.5E-02 | 0.638 |
|         |       |     | Inverse variance |        |       |         |         |       |
| FG      |       | 29  | weighted         | 0.032  | 0.217 | 8.8E-01 | 7.8E-01 |       |

|         |        |     |                  |        |       |         |         |       |
|---------|--------|-----|------------------|--------|-------|---------|---------|-------|
|         |        |     | MR Egger         | 0.217  | 0.397 | 5.9E-01 | 7.6E-01 | 0.584 |
|         |        |     | Inverse variance |        |       |         |         |       |
| HOMA-IR |        | 9   | weighted         | 0.909  | 0.903 | 3.1E-01 | 6.5E-01 |       |
|         |        |     | MR Egger         | -1.435 | 3.973 | 7.3E-01 | 5.9E-01 | 0.564 |
| <hr/>   |        |     |                  |        |       |         |         |       |
|         |        |     | Inverse variance |        |       |         |         |       |
| T2D     |        | 120 | weighted         | -0.135 | 0.049 | 6.2E-03 | 4.1E-02 |       |
|         |        |     | MR Egger         | 0.124  | 0.122 | 3.1E-01 | 7.4E-02 | 0.023 |
|         |        |     | Inverse variance |        |       |         |         |       |
| FG      | IGFBP2 | 29  | weighted         | -0.007 | 0.214 | 9.7E-01 | 4.3E-01 |       |
|         |        |     | MR Egger         | -0.359 | 0.392 | 3.7E-01 | 4.3E-01 | 0.294 |
|         |        |     | Inverse variance |        |       |         |         |       |
| HOMA-IR |        | 9   | weighted         | -2.919 | 0.882 | 9.4E-04 | 7.1E-01 |       |
|         |        |     | MR Egger         | 0.673  | 3.883 | 8.7E-01 | 7.1E-01 | 0.374 |
| <hr/>   |        |     |                  |        |       |         |         |       |
|         |        |     | Inverse variance |        |       |         |         |       |
| T2D     |        | 120 | weighted         | 0.016  | 0.044 | 7.2E-01 | 5.4E-01 |       |
|         |        |     | MR Egger         | 0.064  | 0.112 | 5.7E-01 | 5.2E-01 | 0.641 |
|         |        |     | Inverse variance |        |       |         |         |       |
| FG      | IL1RT1 | 29  | weighted         | 0.098  | 0.230 | 6.7E-01 | 2.3E-01 |       |
|         |        |     | MR Egger         | 0.054  | 0.430 | 9.0E-01 | 1.9E-01 | 0.903 |
|         |        |     | Inverse variance |        |       |         |         |       |
| HOMA-IR |        | 9   | weighted         | 0.766  | 0.881 | 3.8E-01 | 4.8E-01 |       |



|         |       |     |                  |        |       |         |         |       |
|---------|-------|-----|------------------|--------|-------|---------|---------|-------|
|         |       |     | MR Egger         | -0.842 | 3.981 | 8.4E-01 | 3.9E-01 | 0.691 |
|         |       |     | Inverse variance |        |       |         |         |       |
| T2D     |       | 120 | weighted         | -0.058 | 0.051 | 2.5E-01 | 7.2E-02 |       |
|         |       |     | MR Egger         | -0.323 | 0.126 | 1.1E-02 | 1.2E-01 | 0.024 |
|         |       |     | Inverse variance |        |       |         |         |       |
| FG      | IL1ra | 29  | weighted         | -0.632 | 0.221 | 4.2E-03 | 8.5E-01 |       |
|         |       |     | MR Egger         | -0.047 | 0.404 | 9.1E-01 | 9.3E-01 | 0.097 |
|         |       |     | Inverse variance |        |       |         |         |       |
| HOMA-IR |       | 9   | weighted         | -0.082 | 1.101 | 9.4E-01 | 1.8E-01 |       |
|         |       |     | MR Egger         | -4.082 | 4.941 | 4.4E-01 | 1.7E-01 | 0.433 |
|         |       |     | Inverse variance |        |       |         |         |       |
| T2D     |       | 120 | weighted         | -0.133 | 0.047 | 5.1E-03 | 2.7E-01 |       |
|         |       |     | MR Egger         | -0.044 | 0.119 | 7.1E-01 | 2.7E-01 | 0.421 |
|         |       |     | Inverse variance |        |       |         |         |       |
| FG      | LPL   | 29  | weighted         | -0.397 | 0.244 | 1.0E-01 | 1.7E-01 |       |
|         |       |     | MR Egger         | -0.144 | 0.452 | 7.5E-01 | 1.5E-01 | 0.511 |
|         |       |     | Inverse variance |        |       |         |         |       |
| HOMA-IR |       | 9   | weighted         | -2.809 | 0.950 | 3.1E-03 | 3.6E-01 |       |
|         |       |     | MR Egger         | -2.837 | 4.471 | 5.5E-01 | 2.7E-01 | 0.995 |
|         |       |     | Inverse variance |        |       |         |         |       |
| T2D     | PAI   | 120 | weighted         | 0.017  | 0.051 | 7.4E-01 | 1.4E-02 |       |

|         |       |     |                  |        |       |         |         |       |
|---------|-------|-----|------------------|--------|-------|---------|---------|-------|
|         |       |     | MR Egger         | -0.128 | 0.128 | 3.2E-01 | 1.6E-02 | 0.219 |
|         |       |     | Inverse variance |        |       |         |         |       |
| FG      |       | 29  | weighted         | -0.571 | 0.212 | 7.0E-03 | 7.9E-01 |       |
|         |       |     | MR Egger         | -0.085 | 0.389 | 8.3E-01 | 8.5E-01 | 0.148 |
|         |       |     | Inverse variance |        |       |         |         |       |
| HOMA-IR |       | 9   | weighted         | 0.737  | 0.935 | 4.3E-01 | 3.5E-01 |       |
|         |       |     | MR Egger         | -8.579 | 3.893 | 6.3E-02 | 8.9E-01 | 0.044 |
|         |       |     | Inverse variance |        |       |         |         |       |
| T2D     |       | 120 | weighted         | -0.181 | 0.050 | 3.0E-04 | 3.1E-02 |       |
|         |       |     | MR Egger         | 0.064  | 0.124 | 6.1E-01 | 5.4E-02 | 0.033 |
|         |       |     | Inverse variance |        |       |         |         |       |
| FG      | PON3  | 29  | weighted         | 0.185  | 0.229 | 4.2E-01 | 2.6E-01 |       |
|         |       |     | MR Egger         | -0.069 | 0.423 | 8.7E-01 | 2.4E-01 | 0.479 |
|         |       |     | Inverse variance |        |       |         |         |       |
| HOMA-IR |       | 9   | weighted         | -3.731 | 0.884 | 2.5E-05 | 9.4E-01 |       |
|         |       |     | MR Egger         | -0.802 | 3.891 | 8.4E-01 | 9.4E-01 | 0.465 |
|         |       |     | Inverse variance |        |       |         |         |       |
| T2D     |       | 120 | weighted         | -0.032 | 0.049 | 5.2E-01 | 9.9E-02 |       |
|         | PRSS8 |     | MR Egger         | -0.405 | 0.118 | 8.4E-04 | 2.8E-01 | 0.001 |
|         |       |     | Inverse variance |        |       |         |         |       |
| FG      |       | 29  | weighted         | -0.172 | 0.223 | 4.4E-01 | 3.7E-01 |       |

|         |       |     |                  |        |       |         |         |       |
|---------|-------|-----|------------------|--------|-------|---------|---------|-------|
|         |       |     | MR Egger         | 0.073  | 0.413 | 8.6E-01 | 3.4E-01 | 0.484 |
|         |       |     | Inverse variance |        |       |         |         |       |
| HOMA-IR |       | 9   | weighted         | -0.054 | 0.899 | 9.5E-01 | 9.9E-01 |       |
|         |       |     | MR Egger         | 0.111  | 3.957 | 9.8E-01 | 9.8E-01 | 0.967 |
| <hr/>   |       |     |                  |        |       |         |         |       |
|         |       |     | Inverse variance |        |       |         |         |       |
| T2D     |       | 120 | weighted         | 0.027  | 0.046 | 5.5E-01 | 9.0E-01 |       |
|         |       |     | MR Egger         | -0.133 | 0.115 | 2.5E-01 | 9.2E-01 | 0.131 |
|         |       |     | Inverse variance |        |       |         |         |       |
| FG      | PSGL1 | 29  | weighted         | -0.029 | 0.217 | 8.9E-01 | 9.5E-01 |       |
|         |       |     | MR Egger         | 0.182  | 0.398 | 6.5E-01 | 9.5E-01 | 0.532 |
|         |       |     | Inverse variance |        |       |         |         |       |
| HOMA-IR |       | 9   | weighted         | 0.572  | 0.904 | 5.3E-01 | 6.9E-01 |       |
|         |       |     | MR Egger         | -0.927 | 3.978 | 8.2E-01 | 6.0E-01 | 0.710 |
| <hr/>   |       |     |                  |        |       |         |         |       |
|         |       |     | Inverse variance |        |       |         |         |       |
| T2D     |       | 120 | weighted         | 0.007  | 0.100 | 9.5E-01 | 2.4E-65 |       |
|         |       |     | MR Egger         | 0.077  | 0.252 | 7.6E-01 | 1.3E-65 | 0.761 |
|         |       |     | Inverse variance |        |       |         |         |       |
| FG      | SELE  | 29  | weighted         | 0.176  | 0.212 | 4.1E-01 | 9.3E-01 |       |
|         |       |     | MR Egger         | 0.317  | 0.388 | 4.2E-01 | 9.1E-01 | 0.667 |
|         |       |     | Inverse variance |        |       |         |         |       |
| HOMA-IR |       | 9   | weighted         | 2.335  | 0.883 | 8.2E-03 | 8.2E-01 |       |

|         |       |     |                  |        |       |         |         |       |
|---------|-------|-----|------------------|--------|-------|---------|---------|-------|
|         |       |     | MR Egger         | 4.767  | 3.887 | 2.6E-01 | 7.9E-01 | 0.541 |
|         |       |     | Inverse variance |        |       |         |         |       |
| T2D     |       | 120 | weighted         | -0.014 | 0.045 | 7.6E-01 | 7.8E-01 |       |
|         |       |     | MR Egger         | 0.042  | 0.115 | 7.2E-01 | 7.7E-01 | 0.598 |
|         |       |     | Inverse variance |        |       |         |         |       |
| FG      | TIM   | 29  | weighted         | 0.093  | 0.216 | 6.7E-01 | 8.8E-01 |       |
|         |       |     | MR Egger         | 0.351  | 0.396 | 3.8E-01 | 8.7E-01 | 0.444 |
|         |       |     | Inverse variance |        |       |         |         |       |
| HOMA-IR |       | 9   | weighted         | 1.103  | 0.901 | 2.2E-01 | 6.3E-01 |       |
|         |       |     | MR Egger         | -4.535 | 3.967 | 2.9E-01 | 7.8E-01 | 0.188 |
|         |       |     | Inverse variance |        |       |         |         |       |
| T2D     |       | 120 | weighted         | 0.102  | 0.045 | 2.2E-02 | 7.5E-01 |       |
|         |       |     | MR Egger         | -0.040 | 0.112 | 7.2E-01 | 7.7E-01 | 0.171 |
|         |       |     | Inverse variance |        |       |         |         |       |
| FG      | TRAP  | 29  | weighted         | 0.200  | 0.212 | 3.5E-01 | 7.7E-01 |       |
|         |       |     | MR Egger         | -0.036 | 0.389 | 9.3E-01 | 7.5E-01 | 0.476 |
|         |       |     | Inverse variance |        |       |         |         |       |
| HOMA-IR |       | 9   | weighted         | 1.711  | 1.272 | 1.8E-01 | 3.6E-02 |       |
|         |       |     | MR Egger         | -5.461 | 5.295 | 3.4E-01 | 7.4E-02 | 0.207 |
|         |       |     | Inverse variance |        |       |         |         |       |
| T2D     | VSIG2 | 120 | weighted         | -0.026 | 0.046 | 5.7E-01 | 4.7E-01 |       |

|         |         |     |                  |        |       |         |         |       |
|---------|---------|-----|------------------|--------|-------|---------|---------|-------|
|         |         |     | MR Egger         | -0.235 | 0.115 | 4.2E-02 | 5.5E-01 | 0.048 |
|         |         |     | Inverse variance |        |       |         |         |       |
| FG      |         | 29  | weighted         | -0.323 | 0.216 | 1.4E-01 | 5.3E-01 |       |
|         |         |     | MR Egger         | 0.103  | 0.396 | 8.0E-01 | 5.6E-01 | 0.212 |
|         |         |     | Inverse variance |        |       |         |         |       |
| HOMA-IR |         | 9   | weighted         | 0.396  | 0.901 | 6.6E-01 | 6.4E-01 |       |
|         |         |     | MR Egger         | -4.580 | 3.967 | 2.9E-01 | 7.3E-01 | 0.239 |
|         |         |     | Inverse variance |        |       |         |         |       |
| T2D     |         | 120 | weighted         | 0.085  | 0.051 | 9.7E-02 | 9.2E-03 |       |
|         |         |     | MR Egger         | -0.144 | 0.127 | 2.6E-01 | 1.6E-02 | 0.052 |
|         |         |     | Inverse variance |        |       |         |         |       |
| FG      | tPA     | 29  | weighted         | -0.048 | 0.211 | 8.2E-01 | 8.6E-01 |       |
|         |         |     | MR Egger         | -0.335 | 0.387 | 4.0E-01 | 8.5E-01 | 0.386 |
|         |         |     | Inverse variance |        |       |         |         |       |
| HOMA-IR |         | 9   | weighted         | 2.293  | 1.065 | 3.1E-02 | 1.7E-01 |       |
|         |         |     | MR Egger         | -3.689 | 4.440 | 4.3E-01 | 2.4E-01 | 0.209 |
|         |         |     | Inverse variance |        |       |         |         |       |
| T2D     |         | 120 | weighted         | -0.026 | 0.057 | 6.4E-01 | 2.5E-03 |       |
|         | ALDH1A1 |     | MR Egger         | 0.278  | 0.139 | 4.8E-02 | 7.2E-03 | 0.019 |
|         |         |     | Inverse variance |        |       |         |         |       |
| FG      |         | 29  | weighted         | 0.335  | 0.236 | 1.6E-01 | 3.4E-01 |       |

|         |      |     |                  |        |       |         |         |       |
|---------|------|-----|------------------|--------|-------|---------|---------|-------|
|         |      |     | MR Egger         | 0.368  | 0.438 | 4.1E-01 | 2.8E-01 | 0.928 |
|         |      |     | Inverse variance |        |       |         |         |       |
| HOMA-IR |      | 9   | weighted         | -2.179 | 0.959 | 2.3E-02 | 2.9E-01 |       |
|         |      |     | MR Egger         | 6.527  | 4.452 | 1.9E-01 | 5.9E-01 | 0.086 |
| <hr/>   |      |     |                  |        |       |         |         |       |
|         |      |     | Inverse variance |        |       |         |         |       |
| T2D     |      | 120 | weighted         | 0.026  | 0.054 | 6.4E-01 | 2.0E-02 |       |
|         |      |     | MR Egger         | 0.103  | 0.136 | 4.5E-01 | 1.8E-02 | 0.534 |
|         |      |     | Inverse variance |        |       |         |         |       |
| FG      | CDH2 | 29  | weighted         | -0.010 | 0.268 | 9.7E-01 | 9.3E-02 |       |
|         |      |     | MR Egger         | 0.088  | 0.497 | 8.6E-01 | 7.2E-02 | 0.816 |
|         |      |     | Inverse variance |        |       |         |         |       |
| HOMA-IR |      | 9   | weighted         | -1.206 | 1.076 | 2.6E-01 | 1.5E-01 |       |
|         |      |     | MR Egger         | 9.483  | 4.452 | 7.1E-02 | 5.3E-01 | 0.044 |
| <hr/>   |      |     |                  |        |       |         |         |       |
|         |      |     | Inverse variance |        |       |         |         |       |
| T2D     |      | 120 | weighted         | 0.022  | 0.052 | 6.7E-01 | 9.5E-02 |       |
|         |      |     | MR Egger         | 0.232  | 0.128 | 7.3E-02 | 1.2E-01 | 0.077 |
|         |      |     | Inverse variance |        |       |         |         |       |
| FG      | CTSO | 29  | weighted         | 0.009  | 0.300 | 9.8E-01 | 1.5E-02 |       |
|         |      |     | MR Egger         | -0.164 | 0.555 | 7.7E-01 | 1.1E-02 | 0.712 |
|         |      |     | Inverse variance |        |       |         |         |       |
| HOMA-IR |      | 9   | weighted         | -1.827 | 0.877 | 3.7E-02 | 6.7E-01 |       |
| <hr/>   |      |     |                  |        |       |         |         |       |

|         |       |     |                  |        |       |         |         |       |
|---------|-------|-----|------------------|--------|-------|---------|---------|-------|
|         |       |     | MR Egger         | 4.873  | 4.455 | 3.1E-01 | 8.4E-01 | 0.169 |
|         |       |     | Inverse variance |        |       |         |         |       |
| T2D     |       | 120 | weighted         | 0.030  | 0.048 | 5.3E-01 | 4.6E-01 |       |
|         |       |     | MR Egger         | 0.077  | 0.120 | 5.2E-01 | 4.4E-01 | 0.670 |
|         |       |     | Inverse variance |        |       |         |         |       |
| FG      | DDC   | 29  | weighted         | -0.067 | 0.234 | 7.8E-01 | 3.5E-01 |       |
|         |       |     | MR Egger         | -0.123 | 0.435 | 7.8E-01 | 3.0E-01 | 0.878 |
|         |       |     | Inverse variance |        |       |         |         |       |
| HOMA-IR |       | 9   | weighted         | -0.701 | 0.875 | 4.2E-01 | 8.3E-01 |       |
|         |       |     | MR Egger         | 6.354  | 4.448 | 2.0E-01 | 9.8E-01 | 0.150 |
|         |       |     | Inverse variance |        |       |         |         |       |
| T2D     |       | 120 | weighted         | -0.007 | 0.061 | 9.1E-01 | 2.9E-05 |       |
|         |       |     | MR Egger         | 0.229  | 0.151 | 1.3E-01 | 5.8E-05 | 0.092 |
|         |       |     | Inverse variance |        |       |         |         |       |
| FG      | ENPP7 | 29  | weighted         | -0.048 | 0.340 | 8.9E-01 | 6.8E-04 |       |
|         |       |     | MR Egger         | -0.657 | 0.609 | 2.9E-01 | 1.2E-03 | 0.245 |
|         |       |     | Inverse variance |        |       |         |         |       |
| HOMA-IR |       | 9   | weighted         | -2.013 | 0.979 | 4.0E-02 | 2.6E-01 |       |
|         |       |     | MR Egger         | 7.672  | 4.449 | 1.3E-01 | 6.5E-01 | 0.062 |
|         |       |     | Inverse variance |        |       |         |         |       |
| T2D     | NOMO1 | 120 | weighted         | -0.027 | 0.056 | 6.3E-01 | 5.0E-03 |       |

|         |         |     |                  |        |       |         |         |       |
|---------|---------|-----|------------------|--------|-------|---------|---------|-------|
|         |         |     | MR Egger         | 0.210  | 0.139 | 1.3E-01 | 8.7E-03 | 0.065 |
|         |         |     | Inverse variance |        |       |         |         |       |
| FG      |         | 29  | weighted         | 0.031  | 0.243 | 9.0E-01 | 2.7E-01 |       |
|         |         |     | MR Egger         | -0.076 | 0.449 | 8.7E-01 | 2.3E-01 | 0.778 |
|         |         |     | Inverse variance |        |       |         |         |       |
| HOMA-IR |         | 9   | weighted         | -1.942 | 1.024 | 5.8E-02 | 2.1E-01 |       |
|         |         |     | MR Egger         | 9.960  | 4.457 | 6.1E-02 | 8.4E-01 | 0.030 |
| <hr/>   |         |     |                  |        |       |         |         |       |
|         |         |     | Inverse variance |        |       |         |         |       |
| T2D     |         | 120 | weighted         | -0.028 | 0.048 | 5.7E-01 | 3.9E-01 |       |
|         |         |     | MR Egger         | 0.186  | 0.120 | 1.2E-01 | 4.6E-01 | 0.054 |
|         |         |     | Inverse variance |        |       |         |         |       |
| FG      | SIGLEC7 | 29  | weighted         | 0.310  | 0.292 | 2.9E-01 | 2.5E-02 |       |
|         |         |     | MR Egger         | 0.709  | 0.532 | 2.0E-01 | 2.5E-02 | 0.378 |
|         |         |     | Inverse variance |        |       |         |         |       |
| HOMA-IR |         | 9   | weighted         | -0.763 | 0.877 | 3.8E-01 | 6.2E-01 |       |
|         |         |     | MR Egger         | 4.882  | 4.456 | 3.1E-01 | 7.1E-01 | 0.237 |
| <hr/>   |         |     |                  |        |       |         |         |       |



ESM Figure 1. Pearson's correlation coefficient for relationships between the 29 proteins identified as being related to diabetes.

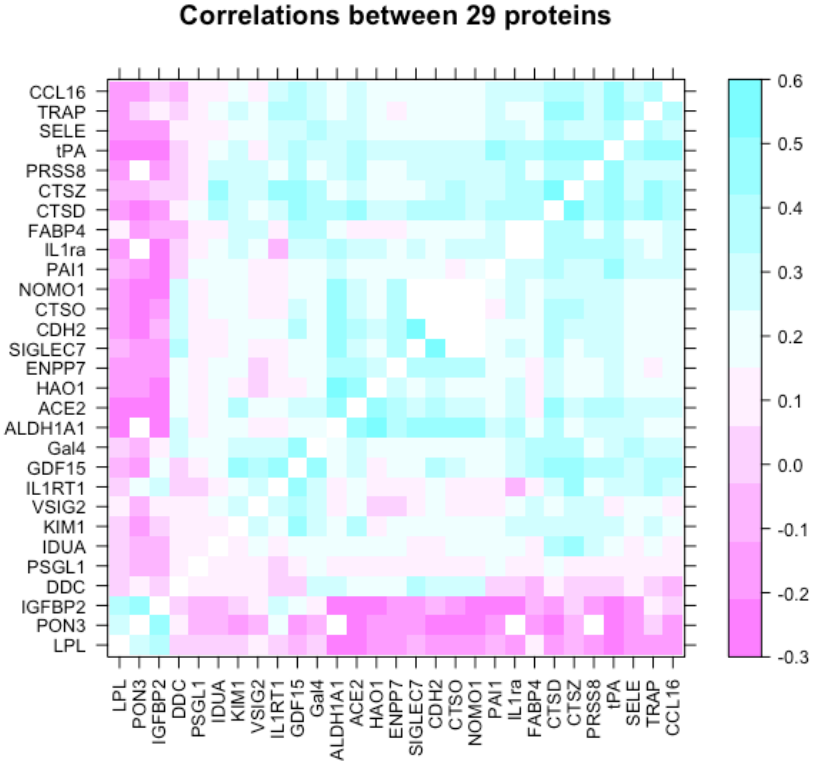

Supplement: 125_2019_4960_MOESM1_ESM.pdf [file 125_2019_4960_MOESM1_ESM.pdf]
